# Supplementary material for: Do Arabinogalactan Proteins Occur in the Transfer Cells of Utricularia dichotoma?
Source: MDPI journal article supplement (doi:10.3390/ijms25126623), 2024-06-16

**Figure S1**

**Figure S1. A.** Control reactions of cell wall components after immunolabeling, section through the quadrifids, apparent lack of green, positive signal of AGPs presence, bar 10  $\mu\text{m}$ .

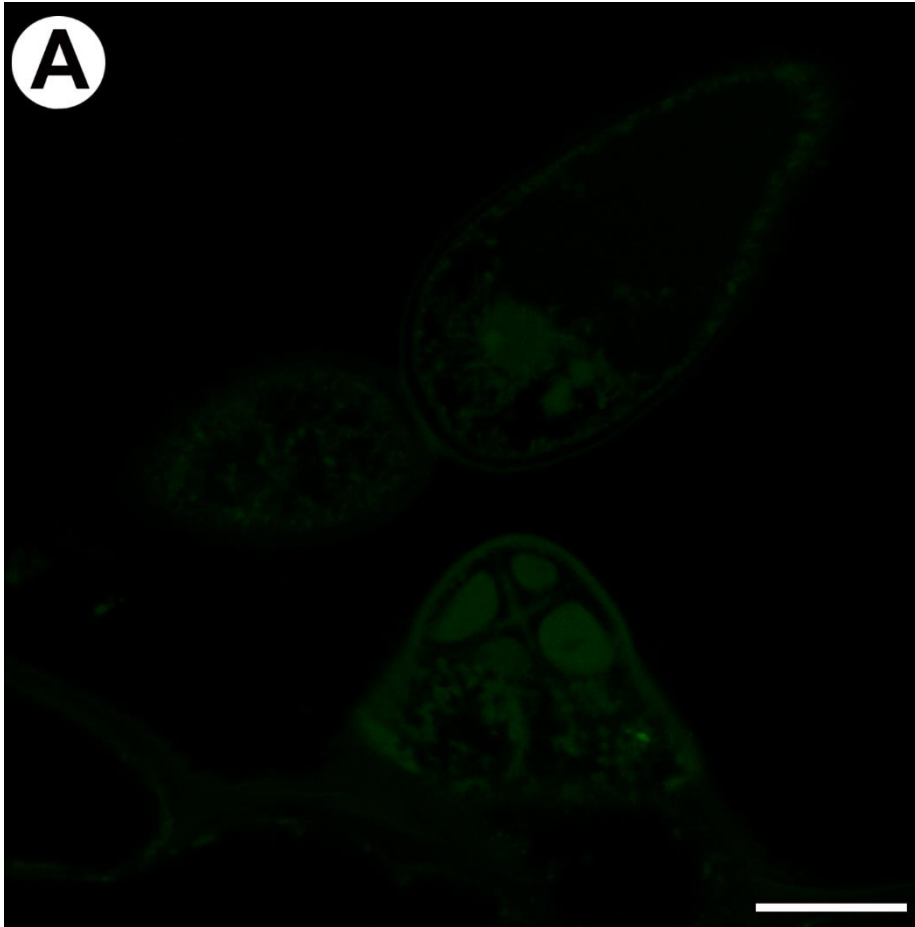

Supplement: s1 [file s1]
